# Supplementary material for: Scoping Review of the Zika Virus Literature
Source: PLoS One. 2016 May 31;11(5):e0156376. doi: 10.1371/journal.pone.0156376 (PMC4887023; doi:10.1371/journal.pone.0156376)
Supplement: S2 File — (XLSX) [file pone.0156376.s002.xlsx]

## Sheet: Sheet1
Refid	Author	Title	Year	Zika DCU_k	language	ArticleType	continent -> North America	continent -> Europe	continent -> Australasia	continent -> Central America/South America/Caribbean	continent -> Asia	continent -> Africa	Country	YearPublished	YearStudyConducted	Pathogenesis	Diagnostic Tests	Epidemiology	Transmission	Surveillance	Virus Study	Vector Study	Mitigation	Qualitative	Other	What is the study design? (Check all that apply) -> Observational study	What is the study design? (Check all that apply) -> Experimental study	What is the study design? (Check all that apply) -> Vector mapping model	Epidemiological studies -> Cross-sectional	Epidemiological studies -> Cohort	Epidemiological studies -> Case-control	Epidemiological studies -> Prevalence survey	Epidemiological studies -> Surveillance or monitoring program	Epidemiological studies -> Case study or case-series	Epidemiological studies -> Outbreak investigation	Epidemiological studies -> Longitudinal study	Epidemiological studies -> diagnostic test evaluation	Epidemiological studies -> Other, specify:	Epidemiological studies -> Other, specify: (COMMENT)	experimental studies -> Controlled trial	experimental studies -> Challenge trial	experimental studies -> Other, specify:	experimental studies -> Other, specify: (COMMENT)	humans	host	host_comment	mosquito	Animal model	Virus only
227	C. V. Ventura,M. Maia,V. Bravo-Filho,A. L. Góis,R. Belfort	Zika virus in Brazil and macular atrophy in a child with microcephaly	2016	Pathogenesis	English	primary peer-reviewed				Central America/South America/Caribbean			Brazil	2011-Present	2015	Pathogenesis										Observational study								Case study or case-series										humans
229	G. A. Calvet,A. M. B. Filippis,M. C. L. Mendonça,P. C. Sequeira,A. M. Siqueira,V. G. Veloso,R. M. Nogueira,P. Brasil	First detection of autochthonous Zika virus transmission in a HIV-infected patient in Rio de Janeiro, Brazil	2016	Pathogenesis-Virus Study	English	primary peer-reviewed				Central America/South America/Caribbean			Brazil	2011-Present	2015	Pathogenesis					Virus Study					Observational study								Case study or case-series										humans
230	M. Aubry,V. Richard,J. Green,J. Broult,D. Musso	Inactivation of Zika virus in plasma with amotosalen and ultraviolet A illumination	2016	Mitigation	English	primary peer-reviewed			Australasia				French Polynesia	2011-Present	2013 - 2014								Mitigation				Experimental study													Controlled trial				humans
231	A. S. Oliveira Melo,G. Malinger,R. Ximenes,P. O. Szejnfeld,S. Alves Sampaio,A. M. Bispo De Filippis	Zika virus intrauterine infection causes fetal brain abnormality and microcephaly: Tip of the iceberg?	2016	Pathogenesis	English	primary peer-reviewed				Central America/South America/Caribbean			Brazil	2011-Present	2015	Pathogenesis					Virus Study					Observational study								Case study or case-series										humans
232	D. Tappe,J. V. Pérez-Girón,L. Zammarchi,J. Rissland,D. F. Ferreira,T. Jaenisch,S. Gómez-Medina,S. Günther,A. Bartoloni,C. Muñoz-Fontela,J. Schmidt-Chanasit	Cytokine kinetics of Zika virus-infected patients from acute to reconvalescent phase	2015	Pathogenesis	English	primary peer-reviewed		Europe					Germany	2011-Present	NR	Pathogenesis											Experimental study													Controlled trial				humans
234	M. Aubry,J. Finke,A. Teissier,C. Roche,J. Broult,S. Paulous,P. Desprès,V. -M Cao-Lormeau,D. Musso	Seroprevalence of arboviruses among blood donors in French Polynesia, 2011-2013	2015	Epidemiology	English	primary peer-reviewed			Australasia				French Polynesia	2011-Present	2011/07 - 2013/10			Epidemiology								Observational study			Cross-sectional															humans
238	J. Tognarelli,S. Ulloa,E. Villagra,J. Lagos,C. Aguayo,R. Fasce,B. Parra,J. Mora,N. Becerra,N. Lagos,L. Vera,B. Olivares,M. Vilches,J. Fernández	A report on the outbreak of Zika virus on Easter Island, South Pacific, 2014	2015	Pathogenesis-Epidemiology-Surveillance-Virus Study	English	primary peer-reviewed				Central America/South America/Caribbean			Easter Island (Chile)	2011-Present	2014/01- 2014/05	Pathogenesis		Epidemiology		Surveillance	Virus Study					Observational study									Outbreak investigation									humans
240	C. T. Diagne,D. Diallo,O. Faye,Y. Ba,O. Faye,A. Gaye,I. Dia,O. Faye,S. C. Weaver,A. A. Sall,M. Diallo	Potential of selected Senegalese Aedes spp. mosquitoes (Diptera: Culicidae) to transmit Zika virus	2015	Vector Study	English	primary peer-reviewed						Africa	Senegal	2011-Present	NR							Vector Study					Experimental study														Challenge trial						mosquito
243		A summary of the key trends in notifiable diseases for 2014	2015	Epidemiology	English	Grey Lit - Primary Data			Australasia				New Zealand	2011-Present	2014			Epidemiology								Observational study							Surveillance or monitoring program											humans
244	G. H. Leung,R. W. Baird,J. Druce,N. M. Anstey	ZIKA VIRUS INFECTION IN AUSTRALIA FOLLOWING A MONKEY BITE IN INDONESIA	2015	Pathogenesis-Virus Study	English	primary peer-reviewed			Australasia				Australia	2011-Present	NR	Pathogenesis					Virus Study					Observational study								Case study or case-series										humans
246	D. Musso,C. Roche,T. -X Nhan,E. Robin,A. Teissier,V. -M Cao-Lormeau	Detection of Zika virus in saliva	2015	Pathogenesis-Diagnostic Tests	English	primary peer-reviewed			Australasia				French Polynesia	2011-Present	2013/10-2014/03	Pathogenesis	Diagnostic Tests									Observational study			Cross-sectional								diagnostic test evaluation							humans
248	R. Buathong,L. Hermann,B. Thaisomboonsuk,W. Rutvisuttinunt,C. Klungthong,P. Chinnawirotpisan,W. Manasatienkij,A. Nisalak,S. Fernandez,I. -K Yoon,P. Akrasewi,T. Plipat	Detection of zika virus infection in Thailand, 2012-2014	2015	Pathogenesis-Virus Study	English	primary peer-reviewed					Asia		Thailand	2011-Present	2012/03-2014/07	Pathogenesis					Virus Study					Observational study						Prevalence survey	Surveillance or monitoring program	Case study or case-series										humans
249	R. Hamel,O. Dejarnac,S. Wichit,P. Ekchariyawat,A. Neyret,N. Luplertlop,M. Perera-Lecoin,P. Surasombatpattana,L. Talignani,F. Thomas,V. -M Cao-Lormeau,V. Choumet,L. Briant,P. Desprès,A. Amara,H. Yssel,D. Missé	Biology of Zika virus infection in human skin cells	2015	Virus Study	English	primary peer-reviewed		Europe					France	2011-Present	NR						Virus Study						Experimental study														Challenge trial								Virus only
250	D. J. Summers,R. W. Acosta,A. M. Acosta	Zika Virus in an American Recreational Traveler	2015	Pathogenesis	English	primary peer-reviewed	North America						United States	2011-Present	2013/12	Pathogenesis										Observational study								Case study or case-series										humans
251	L. Zammarchi,G. Stella,A. Mantella,D. Bartolozzi,D. Tappe,S. Günther,L. Oestereich,D. Cadar,C. Muñoz-Fontela,A. Bartoloni,J. Schmidt-Chanasit	Zika virus infections imported to Italy: Clinical, immunological and virological findings, and public health implications	2015	Pathogenesis	English	primary peer-reviewed		Europe					Italy	2011-Present	2014/01	Pathogenesis										Observational study								Case study or case-series										humans
253	C. Zanluca,V. C. A. De Melo,A. L. P. Mosimann,G. I. V. Dos Santos,C. N. D. dos Santos,K. Luz	First report of autochthonous transmission of Zika virus in Brazil	2015	Pathogenesis-Virus Study	English	primary peer-reviewed				Central America/South America/Caribbean			Brazil	2011-Present	2015/03	Pathogenesis					Virus Study					Observational study								Case study or case-series										humans
254	L. Zammarchi,D. Tappe,C. Fortuna,M. E. Remoli,S. Günther,G. Venturi,A. Bartoloni,J. Schmidt-Chanasit	Zika virus infection in a traveller returning to europe from Brazil, march 2015	2015	Pathogenesis	English	primary peer-reviewed		Europe					Italy	2011-Present	2015/03	Pathogenesis										Observational study								Case study or case-series										humans
255	A. -C Gourinat,O. O’Connor,E. Calvez,C. Goarant,M. Dupont-Rouzeyrol	Detection of zika virus in urine	2015	Pathogenesis-Diagnostic Tests	English	primary peer-reviewed			Australasia				New Caledonia	2011-Present	2014	Pathogenesis	Diagnostic Tests									Observational study								Case study or case-series			diagnostic test evaluation							humans
256	D. Musso,C. Roche,E. Robin,T. Nhan,A. Teissier,V. -M Cao-Lormeau	Potential sexual transmission of zika virus	2015	Pathogenesis	English	primary peer-reviewed			Australasia				French Polynesia	2011-Present	2013/12	Pathogenesis										Observational study								Case study or case-series										humans
259	M. T. Alera,L. Hermann,I. A. Tac-An,C. Klungthong,W. Rutvisuttinunt,W. Manasatienkij,D. Villa,B. Thaisomboonsuk,J. M. Velasco,P. Chinnawirotpisan,C. B. Lago,V. G. Roque,L. R. Macareo,A. Srikiatkhachorn,S. Fernandez,I. -K Yoon	Zika virus infection, Philippines, 2012	2015	Pathogenesis-Surveillance-Virus Study	English	primary peer-reviewed					Asia		Philippines	2011-Present	2012/05	Pathogenesis				Surveillance	Virus Study					Observational study							Surveillance or monitoring program											humans
260	C. W. Cardoso,I. A. Paploski,M. Kikuti,M. S. Rodrigues,M. M. Silva,G. S. Campos,S. I. Sardi,U. Kitron,M. G. Reis,G. S. Ribeiro	Outbreak of Exanthematous Illness associated with Zika, Chikungunya, and Dengue viruses, Salvador, Brazil	2015	Pathogenesis-Epidemiology	English	primary peer-reviewed				Central America/South America/Caribbean			Brazil	2011-Present	2015/02/15-2015/06/25	Pathogenesis		Epidemiology								Observational study									Outbreak investigation									humans
266	D. Tappe,S. Nachtigall,A. Kapaun,P. Schnitzler,S. Günther,J. Schmidt-Chanasit	Acute Zika virus infection after travel to Malaysian Borneo, September 2014	2015	Pathogenesis	English	primary peer-reviewed		Europe					Germany	2011-Present	2014/09	Pathogenesis										Observational study								Case study or case-series										humans
268	M. Dupont-Rouzeyrol,O. O’Connor,E. Calvez,M. Daures,M. John,J. -P Grangeon,A. -C Gourinat	Co-infection with zika and dengue viruses in 2 patients, New Caledonia, 2014	2015	Pathogenesis	English	primary peer-reviewed			Australasia				New Caledonia	2011-Present	2014	Pathogenesis					Virus Study					Observational study								Case study or case-series										humans
269	B. M. Althouse,K. A. Hanley,M. Diallo,A. A. Sall,Y. Ba,O. Faye,D. Diallo,D. M. Watts,S. C. Weaver,D. A. T. Cummings	Impact of climate and mosquito vector abundance on sylvatic arbovirus circulation dynamics in senegal	2015	Surveillance-Vector Study	English	primary peer-reviewed						Africa	Senegal	2011-Present	1972-2008					Surveillance		Vector Study						Vector mapping model																humans			mosquito
272	G. S. Campos,A. C. Bandeira,S. I. Sardi	Zika virus outbreak, Bahia, Brazil	2015	Pathogenesis	English	primary peer-reviewed				Central America/South America/Caribbean			Brazil	2011-Present	2015/03	Pathogenesis					Virus Study					Observational study									Outbreak investigation									humans
277	J. A. Sabogal-Roman,D. R. Murillo-García,M. C. Yepes-Echeverri,J. D. Restrepo-Mejia,S. Granados-Álvarez,A. E. Paniz-Mondolfi,W. E. Villamil-Gómez,D. C. Zapata-Cerpa,K. Barreto-Rodriguez,A. J. Rodríguez-Morales	Healthcare students and workers' knowledge about transmission, epidemiology and symptoms of Zika fever in four cities of Colombia	2015	Qualitative	English	primary peer-reviewed				Central America/South America/Caribbean			Colombia	2011-Present	2015/06-2015/07									Qualitative		Observational study			Cross-sectional															humans
288	N. Macesic,I. J. Abbott,D. F. Johnson	Fever and rash in a husband and wife returning from the Cook Islands	2015	Pathogenesis	English	primary peer-reviewed			Australasia				Australia	2011-Present	2015	Pathogenesis										Observational study								Case study or case-series										humans
290		An outbreak of mumps-like illness	2015	Epidemiology	English	primary peer-reviewed			Australasia				New Zealand	2011-Present	2015			Epidemiology								Observational study							Surveillance or monitoring program											humans
291	Cao-Lormeau,V.-M.;Roche,C.;Teissier,A.;Robin,E.;Berry,A.-L.;Mallet,H.-P.;Sall,A.A.;Musso,D.;	Zika virus, French Polynesia, South Pacific, 2013	2014	Pathogenesis-Epidemiology-Surveillance-Virus Study	English	primary peer-reviewed			Australasia				French Polynesia	2011-Present	2013 October -	Pathogenesis		Epidemiology		Surveillance	Virus Study					Observational study							Surveillance or monitoring program											humans
296	D. Musso,T. Nhan,E. Robin,C. Roche,D. Bierlaire,K. Zisou,A. Shan Yan,V. M. Cao-Lormeau,J. Broult	Potential for Zika virus transmission through blood transfusion demonstrated during an outbreak in French Polynesia, November 2013 to February 2014	2014	Epidemiology-Transmission	English	primary peer-reviewed			Australasia				French Polynesia	2011-Present	2013/11/21-2014/02/17			Epidemiology	Transmission		Virus Study					Observational study			Cross-sectional															humans
298	M. Besnard,S. Lastère,A. Teissier,V. M. Cao-Lormeau,D. Musso	Evidence of perinatal transmission of zika virus, French Polynesia, December 2013 and February 2014	2014	Pathogenesis-Transmission	English	primary peer-reviewed			Australasia				French Polynesia	2011-Present	2013 December - 2014 February	Pathogenesis			Transmission							Observational study								Case study or case-series										humans
300	E. Oehler,L. Watrin,P. Larre,I. Leparc-Goffart,S. Lastãre,F. Valour,L. Baudouin,H. P. Mallet,D. Musso,F. Ghawche	Zika virus infection complicated by guillain-barré syndrome â€"case report, French Polynesia, December 2013	2014	Pathogenesis	English	primary peer-reviewed			Australasia				French Polynesia	2011-Present	2013/11	Pathogenesis										Observational study								Case study or case-series										humans
302	J. P. Ledermann,L. Guillaumot,L. Yug,S. C. Saweyog,M. Tided,P. Machieng,M. Pretrick,M. Marfel,A. Griggs,M. Bel,M. R. Duffy,W. T. Hancock,T. Ho-Chen,A. M. Powers	Aedes hensilli as a Potential Vector of Chikungunya and Zika Viruses	2014	Epidemiology-Vector Study	English	primary peer-reviewed			Australasia				Yap island, Micronesia (survey)	2011-Present	2007/04 - 2007/07			Epidemiology				Vector Study				Observational study	Experimental study					Prevalence survey									Challenge trial						mosquito
303	N. Berthet,E. Nakouné,B. Kamgang,B. Selekon,S. Descorps-Declère,A. Gessain,J. -C Manuguerra,M. Kazanji	Molecular characterization of three zika flaviviruses obtained from sylvatic mosquitoes in the Central African Republic	2014	Virus Study	English	primary peer-reviewed						Africa	Central African Republic	2011-Present	1976-1980						Virus Study					Observational study								Case study or case-series													mosquito
304	S. Kutsuna,Y. Kato,T. Takasaki,M. L. Moi,A. Kotaki,H. Uemura,T. Matono,Y. Fujiya,M. Mawatari,N. Takeshita,K. Hayakawa,S. Kanagawa,N. Ohmagari	Two cases of zika fever imported from french polynesia to Japan, December to January 2013 + erratum Refid 315	2014	Pathogenesis-Virus Study	English	primary peer-reviewed					Asia		Japan	2011-Present	2013/12 - 2014/01	Pathogenesis					Virus Study					Observational study								Case study or case-series										humans
305	G. Grard,M. Caron,I. M. Mombo,D. Nkoghe,S. Mboui Ondo,D. Jiolle,D. Fontenille,C. Paupy,E. M. Leroy	Zika Virus in Gabon (Central Africa) - 2007: A New Threat from Aedes albopictus?	2014	Epidemiology-Virus Study-Vector Study	English	primary peer-reviewed						Africa	Gabon	2011-Present	2007 and 2010			Epidemiology			Virus Study	Vector Study				Observational study						Prevalence survey												humans			mosquito
306	D. Tappe,J. Rissland,M. Gabriel,P. Emmerich,S. Günther,G. Held,S. Smola,J. Schmidt-Chanasit	First case of laboratory-confirmed zika virus infection imported into Europe, November 2013	2014	Pathogenesis	English	primary peer-reviewed		Europe					Germany	2011-Present	2013/11	Pathogenesis										Observational study								Case study or case-series										humans
307	A. Roth,A. Mercier,C. Lepers,D. Hoy,S. Duituturaga,E. Benyon,L. Guillaumot,Y. Souarès	Concurrent outbreaks of dengue, chikungunya and zika virus infections – An unprecedented epidemic wave of mosquito-borne viruses in the Pacific 2012–2014	2014	Epidemiology-Surveillance	English	primary peer-reviewed			Australasia				Pacific Public Health Surveillance Network (PPHSN) = Micronesia, Polynesia and Melanesia	2011-Present	2012-2014			Epidemiology		Surveillance						Observational study							Surveillance or monitoring program											humans
308	O. Faye,C. C. M. Freire,A. Iamarino,O. Faye,J. V. C. de Oliveira,M. Diallo,P. M. A. Zanotto,A. A. Sall	Molecular Evolution of Zika Virus during Its Emergence in the 20th Century	2014	Virus Study	English	primary peer-reviewed						Africa	Senegal and Cote d'Ivoire	2011-Present	1947 - 2007						Virus Study					Observational study												Other, specify:	molecular epidemiology										Virus only
311	T. Wæhre,A. Maagard,D. Tappe,D. Cadar,J. Schmidt-Chanasit	Zika virus infection after travel to Tahiti, December 2013	2014	Pathogenesis-Virus Study	English	primary peer-reviewed		Europe					Norway	2011-Present	2013/12	Pathogenesis					Virus Study					Observational study								Case study or case-series										humans
321	K. B. Brust,W. S. Prince,R. C. Fader	Trouble in paradise	2014	Pathogenesis	English	primary peer-reviewed	North America						United States	2011-Present	2014	Pathogenesis										Observational study								Case study or case-series										humans
327	O. Faye,O. Faye,D. Diallo,M. Diallo,M. Weidmann,A. A. Sall	Quantitative real-time PCR detection of Zika virus and evaluation with field-caught Mosquitoes	2013	Diagnostic Tests	English	primary peer-reviewed						Africa	Senegal	2011-Present	2011		Diagnostic Tests									Observational study											diagnostic test evaluation										mosquito		Virus only
328	J. C. Kwong,J. D. Druce,K. Leder	Case report: Zika virus infection acquired during brief travel to indonesia	2013	Pathogenesis-Virus Study	English	primary peer-reviewed			Australasia				Australia	2011-Present	2012 - not specified in paper	Pathogenesis					Virus Study					Observational study								Case study or case-series										humans
329	P. -S J. Wong,M. -z I. Li,C. -S Chong,L. -C Ng,C. -H Tan	Aedes (Stegomyia) albopictus (Skuse): A Potential Vector of Zika Virus in Singapore	2013	Vector Study	English	primary peer-reviewed					Asia		Singapore	2011-Present	NR							Vector Study					Experimental study														Challenge trial						mosquito
331	M. N. Balm,C. K. Lee,H. K. Lee,L. Chiu,E. S. Koay,J. W. Tang	A diagnostic polymerase chain reaction assay for Zika virus	2012	Diagnostic Tests	English	primary peer-reviewed					Asia		Singapore	2011-Present	NR		Diagnostic Tests									Observational study											diagnostic test evaluation							humans
333	M. I. Li,P. S. J. Wong,L. C. Ng,C. H. Tan	Oral Susceptibility of Singapore Aedes (Stegomyia) aegypti (Linnaeus) to Zika Virus	2012	Vector Study	English	primary peer-reviewed					Asia		Singapore	2011-Present	NR							Vector Study					Experimental study														Challenge trial						mosquito
336	A. D. Haddow,A. J. Schuh,C. Y. Yasuda,M. R. Kasper,V. Heang,R. Huy,H. Guzman,R. B. Tesh,S. C. Weaver	Genetic characterization of zika virus strains: Geographic expansion of the asian lineage	2012	Virus Study	English	primary peer-reviewed	North America						United States	2011-Present	NR						Virus Study					Observational study												Other, specify:	Molecular epidemiology										Virus only
337	V. Heang,C. Y. Yasuda,L. Sovann,A. D. Haddow,A. P. T. da Rosa,R. B. Tesh,M. R. Kasper	Zika virus infection, Cambodia, 2010	2012	Pathogenesis	English	primary peer-reviewed					Asia		Cambodia	2011-Present	2010/08	Pathogenesis										Observational study								Case study or case-series										humans
338	B. D. Foy,K. C. Kobylinski,J. L. C. Foy,B. J. Blitvich,A. T. da Rosa,A. D. Haddow,R. S. Lanciotti,R. B. Tesh	Probable Non-Vector-borne Transmission of Zika Virus, Colorado, USA	2011	Pathogenesis-Transmission	English	primary peer-reviewed	North America						United States	2011-Present	2008	Pathogenesis			Transmission							Observational study								Case study or case-series										humans
342	E. B. Fokam,L. D. Levai,H. Guzman,P. A. Amelia,V. P. Titanji,R. B. Tesh,S. C. Weaver	Silent circulation of arboviruses in Cameroon.	2010	Epidemiology	English	primary peer-reviewed						Africa	Cameroon	2001-2010	2010			Epidemiology								Observational study						Prevalence survey												humans
350	M. R. Duffy,T. -H Chen,W. T. Hancock,A. M. Powers,J. L. Kool,R. S. Lanciotti,M. Pretrick,M. Marfel,S. Holzbauer,C. Dubray,L. Guillaumot,A. Griggs,M. Bel,A. J. Lambert,J. Laven,O. Kosoy,A. Panella,B. J. Biggerstaff,M. Fischer,E. B. Hayes	Zika virus outbreak on Yap Island, Federated States of Micronesia	2009	Pathogenesis-Epidemiology-Vector Study	English	primary peer-reviewed			Australasia				Yap Island, Micronesia	2001-2010	2007 : April 1 through July 31, 2007.	Pathogenesis		Epidemiology				Vector Study				Observational study			Cross-sectional															humans			mosquito
354	O. Faye,O. Faye,A. Dupressoir,M. Weidmann,M. Ndiaye,A. Alpha Sall	One-step RT-PCR for detection of Zika virus	2008	Diagnostic Tests	English	primary peer-reviewed						Africa	Senegal	2001-2010	NR		Diagnostic Tests									Observational study											diagnostic test evaluation							humans
355	R. S. Lanciotti,O. L. Kosoy,J. J. Laven,J. O. Velez,A. J. Lambert,A. J. Johnson,S. M. Stanfield,M. R. Duffy	Genetic and serologic properties of Zika virus associated with an epidemic, Yap State, Micronesia, 2007	2008	Diagnostic Tests-Virus Study	English	primary peer-reviewed			Australasia				Yap Island, Micronesia	2001-2010	2007		Diagnostic Tests				Virus Study					Observational study											diagnostic test evaluation							humans
358	G. Kuno,G. -J J. Chang	Full-length sequencing and genomic characterization of Bagaza, Kedougou, and Zika viruses	2007	Virus Study	English	primary peer-reviewed	North America						United States	2001-2010	NR						Virus Study					Observational study												Other, specify:	molecular epidemiology										Virus only
371	A. M. Kilbourn,W. B. Karesh,N. D. Wolfe,E. J. Bosi,R. A. Cook,M. Andau	Health evaluation of free-ranging and semi-captive orangutans (Pongo pygmaeus pygmaeus) in Sabah, Malaysia	2003	Epidemiology	English	primary peer-reviewed					Asia		Malaysia	2001-2010	1996/08 - 1998/05			Epidemiology								Observational study						Prevalence survey													host	free ranging orangutans
374	N. D. Wolfe,A. M. Kilbourn,W. B. Karesh,H. A. Rahman,E. J. Bosi,B. C. Cropp,M. Andau,A. Spielman,D. J. Gubler	Sylvatic transmission of arboviruses among Bornean orangutans	2001	Epidemiology	English	primary peer-reviewed					Asia		Malaysia	2001-2010	1996-1997			Epidemiology								Observational study						Prevalence survey												humans	host	Orangutans (subset of reported in 371)
380	S. S. Baba,A. H. Fagbami,O. D. Olaleye	Antigenic relatedness of selected flaviviruses: Study with homologous and heterologous immune mouse ascitic fluids	1998	Virus Study	English	primary peer-reviewed						Africa	Nigeria	1991-2000	NR						Virus Study						Experimental study														Challenge trial								Virus only
388	V. Pierre,M. -T Drouet,V. Deubel	Identification of mosquito-borne flavivirus sequences using universal primers and reverse transcription/polymerase chain reaction	1994	Diagnostic Tests	English	primary peer-reviewed		Europe					France	1991-2000	NR		Diagnostic Tests										Experimental study														Challenge trial								Virus only
389	E. Monlun,H. Zeller,B. Le Guenno,M. Traoré-Lamizana,J. P. Hervy,F. Adam,L. Ferrara,D. Fontenille,R. Sylla,M. Mondo	Surveillance of the circulation of arbovirus of medical interest in the region of eastern Senegal	1993	Epidemiology	French	primary peer-reviewed						Africa	Senegal	1991-2000	1988/11 -1991/11			Epidemiology								Observational study						Prevalence survey												humans			mosquito
391	B. R. Miller,C. J. Mitchell	Genetic selection of a flavivirus-refractory strain of the yellow fever mosquito Aedes aegypti	1991	Mitigation	English	primary peer-reviewed	North America						United States	1991-2000	NR								Mitigation				Experimental study														Challenge trial						mosquito
395	A. Buckley,E. A. Gould	Detection of virus-specific antigen in the nuclei or nucleoli of cells infected with Zika or Langat virus	1988	Virus Study	English	primary peer-reviewed		Europe					United Kingdom	1981-1990	NR						Virus Study						Experimental study														Challenge trial								Virus only
396	J. F. Saluzzo,J. L. Sarthou,M. Cornet	Specific ELISA-IgM antibodies for diagnosis and epidemiological surveillance of flaviviruses in Africa	1986	Diagnostic Tests-Surveillance	French	primary peer-reviewed						Africa	Senagal (humans) and Burkina Faso (monkeys)	1981-1990	1983-1984		Diagnostic Tests			Surveillance						Observational study							Surveillance or monitoring program											humans	host	"monkeys"
400	J. G. Olson,T. G. Ksiazek,D. J. Gubler,S. I. Lubis,G. Simanjuntak,V. H. Lee,S. Nalim,K. Juslis,R. See	A survey for arboviral antibodies in sera of humans and animals in Lombok, Republic of Indonesia	1983	Epidemiology	English	primary peer-reviewed					Asia		Indonesia	1981-1990	1978			Epidemiology								Observational study						Prevalence survey												humans	host	horse, cow, carabao, goat, chicken, duck, bat, rat, wild birds
402	M. A. Darwish,H. Hoogstraal,T. J. Roberts,I. P. Ahmed,F. Omar	A sero-epidemiological survey for certain arboviruses (Togaviridae) in Pakistan	1983	Epidemiology	English	primary peer-reviewed					Asia		Pakistan	1981-1990	NR			Epidemiology								Observational study						Prevalence survey												humans	host	rodents (9 species), cow, buffalo, sheep, goats
403	E. O. Adekolu-John,A. H. Fagbami	Arthropod-borne virus antibodies in sera of residents of Kainji Lake Basin, Nigeria 1980	1983	Epidemiology	English	primary peer-reviewed						Africa	Nigeria	1981-1990	1980			Epidemiology								Observational study						Prevalence survey												humans
404	J. F. Saluzzo,B. Ivanoff,G. Languillat,A. J. Georges	Serological survey for arbovirus antibodies in the human and simian populations of the South East of Gabon	1982	Epidemiology-Transmission	French	primary peer-reviewed						Africa	Gabon	1981-1990	1979/10 - 1980/03			Epidemiology	Transmission							Observational study						Prevalence survey												humans	host	monkey = Simian
405	A. W. R. McCrae,B. G. Kirya	Yellow fever and Zika virus epizootics and enzootics in Uganda	1982	Epidemiology-Surveillance-Vector Study	English	primary peer-reviewed						Africa	Uganda	1981-1990	1961-1970			Epidemiology		Surveillance		Vector Study				Observational study										Longitudinal study									host	Monkeys: Vervet monkey-Cerco@hezus uethiops (L.); Redtail monkey (these were sampled only in 1969) <ercopithecus ascunius schmidti Matschie; Mona monkey-Cercopithecus mona denti Thomas; Black Mangabey4kmcebus ulbigenu johnszoni Lydekker; Lowland Colobus-Cofobus ubyssinicus ue1Lmi.s Matschie.	mosquito
407	J. F. Saluzzo,J. P. Gonzalez,J. P. Herve,A. J. Georges	Serological survey for the prevalence of certain arboviruses in the human population of the south-east area of Central African Republic	1981	Epidemiology	French	primary peer-reviewed						Africa	Central African Republic	1981-1990	1979			Epidemiology								Observational study						Prevalence survey												humans
408	J. G. Olson,T. G. Ksiazek,Suhandiman,Triwibowo	Zika virus, a cause of fever in Central Java, Indonesia	1981	Pathogenesis	English	primary peer-reviewed					Asia		Indonesia	1981-1990	1977-1978	Pathogenesis										Observational study								Case study or case-series										humans
411	A. H. Fagbami	Zika virus infections in Nigeria: Virological and seroepidemiological investigations in Oyo State	1979	Pathogenesis-Epidemiology	English	primary peer-reviewed						Africa	Nigeria	1971-1980	1971-1974	Pathogenesis		Epidemiology								Observational study						Prevalence survey												humans
412	Jan Ch.,G. Languillat,J. Renaudet,Y. Robin	A serologic survey on arboviruses in Gabon	1978	Epidemiology	French	primary peer-reviewed						Africa	Gabon	1971-1980	1975			Epidemiology								Observational study						Prevalence survey												humans
413	A. Fagbami	Epidemiological investigations on arbovirus infections at Igbo-Ora, Nigeria	1977	Epidemiology	English	primary peer-reviewed						Africa	Nigeria	1971-1980	1975/05-1975/10			Epidemiology								Observational study						Prevalence survey												humans
414	B. G. Kirya,N. O. Okia	A yellow fever epizootic in Zika Forest, Uganda, during 1972: Part 2: Monkey serology	1977	Epidemiology	English	primary peer-reviewed						Africa	Uganda	1971-1980	1972/07/1-18			Epidemiology								Observational study						Prevalence survey													host	Monkey: grey vervet and red tail
416	H. J. Way,E. T. W. Bowen,G. S. Platt	Comparative studies of some African arboviruses in cell culture and in mice	1976	Virus Study	English	primary peer-reviewed		Europe					England	1971-1980	nr						Virus Study						Experimental study														Challenge trial							Animal model	Virus only
417	D. L. Moore,O. R. Causey,D. E. Carey,S. Reddy,A. R. Cooke,F. M. Akinkugbe,T. S. David-West,G. E. Kemp	Arthropod borne viral infections of man in Nigeria, 1964-1970	1975	Epidemiology-Surveillance	English	primary peer-reviewed						Africa	nigeria	1971-1980	1964-1970			Epidemiology		Surveillance						Observational study							Surveillance or monitoring program											humans
419	P. F. D. Van Peenen,S. W. Joseph,J. Casals	Arbovirus antibodies in Indonesians at Malili, South Sulawesi (Celebes) and Balikpapan, E. Kalimantan (Borneo)	1975	Epidemiology	English	primary peer-reviewed					Asia		Indonesia - South Sulawesi and East Kalimantan	1971-1980	1973			Epidemiology								Observational study						Prevalence survey												humans
420	R. Boche,C. Jan,P. Le Noc,P. Ravisse	Immunologic survey on the incidence of arboviruses in the Pygmy population in Eastern Cameroon (Djoum area)	1974	Epidemiology	French	primary peer-reviewed						Africa	Cameroon	1971-1980	1972			Epidemiology								Observational study						Prevalence survey												humans
421	A. R. Filipe,C. M. V. Martins,H. Rocha	Laboratory infection with Zika virus after vaccination against yellow fever	1973	Pathogenesis	English	primary peer-reviewed		Europe					Portugal	1971-1980	NR	Pathogenesis										Observational study								Case study or case-series										humans
425	T. P. Monath,D. C. Wilson,J. Casals	The 1970 yellow fever epidemic in Okwoga District, Benue Plateau State, Nigeria. 3. Serological responses in persons with and without pre existing heterologous group B immunity	1973	Epidemiology	English	primary peer-reviewed						Africa	Nigeria	1971-1980	1965-1966 and 1970			Epidemiology								Observational study						Prevalence survey												humans
427	E. T. W. Bowen,D. I. H. Simpson,G. S. Platt,H. Way,W. F. Bright,J. Day,S. Achapa,J. M. D. Roberts	Large scale irrigation and arbovirus epidemiology, Kano plain, Kenya II. Preliminary serological survey	1973	Epidemiology	English	primary peer-reviewed						Africa	Kenya	1971-1980	1969/05 - 1969/06			Epidemiology								Observational study						Prevalence survey												humans
429	T. M. Bell,E. J. Field,H. K. Narang	Zika virus infection of the central nervous system of mice	1971	Pathogenesis-Virus Study	English	primary peer-reviewed		Europe					England	1971-1980	NR	Pathogenesis					Virus Study						Experimental study														Challenge trial							Animal model
431	N. J. Marchette,R. Garcia,A. Rudnick	Isolation of Zika virus from Aedes aegypti mosquitoes in Malaysia.	1969	Epidemiology-Vector Study	English	primary peer-reviewed					Asia		Malaysia	1960-1970	1966			Epidemiology				Vector Study				Observational study						Prevalence survey															mosquito	Animal model
433	R. H. Kokernot,V. M. R. Casaca,M. P. Weinbren,B. M. McIntosh	Survey for antibodies against arthropod-borne viruses in the sera of indigenous residents of Angola	1965	Epidemiology	English	primary peer-reviewed						Africa	Angola	1960-1970	1960/05 - 1960/06			Epidemiology								Observational study						Prevalence survey												humans
434	D. I. SIMPSON	ZIKA VIRUS INFECTION IN MAN.	1964	Pathogenesis	English	primary peer-reviewed						Africa	Uganda	1960-1970	1962-62	Pathogenesis										Observational study								Case study or case-series										humans
435	A. J. HADDOW,M. C. WILLIAMS,J. P. WOODALL,D. I. SIMPSON,L. K. GOMA	TWELVE ISOLATIONS OF ZIKA VIRUS FROM AEDES (STEGOMYIA) AFRICANUS (THEOBALD) TAKEN IN AND ABOVE A UGANDA FOREST.	1964	Epidemiology	English	primary peer-reviewed						Africa	Uganda	1960-1970	1961/11-1963/06			Epidemiology								Observational study						Prevalence survey													host	25 "small mammals" did not have a high HI for Zika: 1 Potto-Perodicticus potto (P. L. S. Muller), 3 Palm civets-Nandinia binotata (Reinwardt), 4 Squirrels-Heliosciurus rufobrachium Waterhouse, 2 Tree rats-Thamnomys rutilans Doilman, 7 Giant pouched rats-Cricetomys gambianus Wroughton, 8 Field rats-Arvicanthis abyssinicus (Ruppell)	mosquito	Animal model
437	W. L. Pond	Arthropod-borne virus antibodies in sera from residents of South-East Asia	1963	Epidemiology	English	primary peer-reviewed					Asia		"Southeast Asia" Malaysia, Thailand and N. Vietnam.	1960-1970	1953-4			Epidemiology								Observational study						Prevalence survey												humans				Animal model
439	F. N. Macnamara,D. W. Horn,J. S. Porterfield	Yellow fever and other arthropod-borne viruses. A consideration of two serological surveys made in South Western Nigeria	1959	Epidemiology	English	primary peer-reviewed						Africa	Nigeria	Pre 1960	1951 and 1955			Epidemiology								Observational study						Prevalence survey												humans
440	M. P. Weinbren,M. C. Williams	Zika virus: Further isolations in the zika area, and some studies on the strains isolated	1958	Pathogenesis-Epidemiology	English	primary peer-reviewed						Africa	Uganda	Pre 1960	1956/05/09-1956/08/26	Pathogenesis		Epidemiology								Observational study	Experimental study					Prevalence survey									Challenge trial						mosquito	Animal model
441	W. G. C. Bearcroft	Zika virus infection experimentally induced in a human volunteer	1956	Pathogenesis-Transmission	English	primary peer-reviewed						Africa	Nigeria	Pre 1960	1956	Pathogenesis			Transmission								Experimental study														Challenge trial			humans			mosquito	Animal model
442	J. P. T. Boorman,J. S. Porterfield	A simple technique for infection of mosquitoes with viruses transmission of zika virus	1956	Transmission-Vector Study	English	primary peer-reviewed						Africa	Nigeria	Pre 1960	NR				Transmission			Vector Study					Experimental study														Challenge trial						mosquito	Animal model
443	F. N. MacNamara	Zika virus : A report on three cases of human infection during an epidemic of jaundice in Nigeria	1954	Pathogenesis-Epidemiology	English	primary peer-reviewed						Africa	Nigeria	Pre 1960	1952	Pathogenesis		Epidemiology								Observational study						Prevalence survey		Case study or case-series										humans				Animal model
444	R. L. REAGAN,A. L. BRUECKNER	Comparison by electron microscopy of the Ntaya and Zika viruses.	1953	Virus Study	English	primary peer-reviewed	North America						United States	Pre 1960	nr						Virus Study						Experimental study														Challenge trial							Animal model	Virus only
446	G. W. A. Dick	Zika virus (II). Pathogenicity and physical properties	1952	Pathogenesis-Epidemiology-Virus Study	English	primary peer-reviewed						Africa	Uganda	Pre 1960		Pathogenesis		Epidemiology			Virus Study					Observational study	Experimental study					Prevalence survey									Challenge trial			humans			mosquito	Animal model
447	G. W. A. Dick,S. F. Kitchen,A. J. Haddow	Zika Virus (I). Isolations and serological specificity	1952	Virus Study	English	primary peer-reviewed						Africa	Uganda	Pre 1960	1947-8						Virus Study					Observational study							Surveillance or monitoring program												host	Rhesus monkey	mosquito	Animal model
503	Isaac I. Bogoch,Oliver J. Brady,Moritz U. G. Kraemer,Matthew German,Marisa I. Creatore,Manisha A. Kulkarni,John S. Brownstein,Sumiko R. Mekaru,Simon I. Hay,Emily Groot,Alexander Watts,Kamran Khan	Anticipating the international spread of Zika virus from Brazil	2016	Other	English	primary peer-reviewed	North America						Canada	2011-Present	2016										Other			Vector mapping model
576	Antoine Enfissi,John Codrington,Jimmy Roosblad,Mirdad Kazanji,Dominique Rousset	Zika virus genome from the Americas	2016	Pathogenesis-Virus Study	English	primary peer-reviewed				Central America/South America/Caribbean			Suriname	2011-Present	2015/10	Pathogenesis					Virus Study					Observational study								Case study or case-series										humans
684	M. Cornet,Y. Robin,C. Adam,M. Valade,M. A. Calvo	Comparison between experimental transmission of yellow fever and Zika viruses in Aedes aegypti.	1979	Vector Study	French	primary peer-reviewed						Africa	Senegal	1971-1980	1976							Vector Study					Experimental study														Challenge trial						mosquito
717	D. Diallo,A. A. Sall,C. T. Diagne,O. Faye,O. Faye,Y. Ba,K. A. Hanley,M. Buenemann,S. C. Weaver,M. Diallo	Zika virus emergence in mosquitoes in Southeastern Senegal, 2011.	2014	Epidemiology-Vector Study	English	primary peer-reviewed						Africa	Senegal	2011-Present	2011/04 - 2011/12			Epidemiology				Vector Study				Observational study						Prevalence survey															mosquito
718	K. Fonseca,B. Meatherall,D. Zarra,M. Drebot,J. MacDonald,K. Pabbaraju,S. Wong,P. Webster,R. Lindsay,R. Tellier	First case of Zika virus infection in a returning Canadian traveler.	2014	Pathogenesis-Virus Study	English	primary peer-reviewed	North America						Canada	2011-Present	2013/02	Pathogenesis					Virus Study					Observational study								Case study or case-series										humans
725	C. Baronti,G. Piorkowski,R. N. Charrel,L. Boubis,I. LeparcGoffart,X. Lamballerie	Complete coding sequence of Zika virus from a French Polynesia outbreak in 2013.	2014	Pathogenesis-Virus Study	English	primary peer-reviewed		Europe					France	2011-Present	2013/11	Pathogenesis					Virus Study					Observational study								Case study or case-series										humans
782	C. AkouaKoffi,S. Diarrassouba,V. B. Benie,J. M. Ngbichi,T. Bozoua,A. Bosson,V. Akran,P. Carnevale,A. Ehouman	Inquiry into a fatal case of yellow fever in Cote d'Ivoire in 1999	2001	Epidemiology	French	primary peer-reviewed						Africa	Côte d’Ivoire	2001-2010	1999			Epidemiology								Observational study						Prevalence survey												humans			mosquito
804	M. TraoreLamizana,H. Zeller,E. Monlun,M. Mondo,J. P. Hervy,F. Adam,J. P. Digoutte	Dengue 2 outbreak in southeastern Senegal during 1990: virus isolations from mosquitoes (Diptera: Culicidae).	1994	Epidemiology	English	primary peer-reviewed						Africa	Senegal	1991-2000	1990			Epidemiology								Observational study						Prevalence survey															mosquito
809	V. Robert,M. Lhuillier,D. Meunier	Yellow fever virus, dengue 2 virus and other arboviruses isolated from mosquitoes in Burkina Faso during 1983-86. Entomological and epidemiological considerations	1993	Epidemiology-Surveillance	French	primary peer-reviewed						Africa	Burkina Faso	1991-2000	1983-1986			Epidemiology		Surveillance						Observational study							Surveillance or monitoring program														mosquito
814	F. Rodhain,B. Carterton,R. Laroche,C. Hannoun	Human arbovirus infections in Burundi: results of a seroepidemiological survey, 1980-1982	1987	Epidemiology	French	primary peer-reviewed						Africa	Burundi	1981-1990	1980-1982			Epidemiology								Observational study						Prevalence survey												humans
832	M. Cornet,Y. Robin,R. Chateau,G. Heme,C. Adam,M. Valade,G. le Gonidec,C. Jan,J. Renaudet,P. L. Dieng,J. F. Bangoura,A. Lorard	Isolations of arboviruses in eastern Senegal from mosquitoes (1972-1977) and notes on the epidemiology of viruses transmitted by Aedes spp., especially yellow fever	1979	Epidemiology	French	primary peer-reviewed						Africa	Senegal	1971-1980	1972-1977			Epidemiology								Observational study						Prevalence survey															mosquito
839	Y. Robin,J. Mouchet	Serological and entomological survey of yellow fever in Sierra Leone	1975	Epidemiology	French	primary peer-reviewed						Africa	Sierra Leone	1971-1980	1972			Epidemiology								Observational study						Prevalence survey												humans
846	V. H. Lee,D. L. Moore	Vectors of the 1969 yellow fever epidemic on the Jos Plateau, Nigeria.	1972	Epidemiology	English	primary peer-reviewed						Africa	nigeria	1971-1980	1969			Epidemiology								Observational study						Prevalence survey															mosquito
903		Amotosalen and ultraviolet a light inactivate zika virus in plasma.	2015	Mitigation	English	Conference Proceeding	North America						United States	2011-Present	NR								Mitigation				Experimental study														Challenge trial								Virus only
935		Epidemiological and molecular features of dengue, Zika and Chikungunya concurrent outbreaks in the pacific, 2014. (Conference Proceeding- abstract only)	2014		English	Conference Proceeding			Australasia				Pacific Islands	2011-Present	2014			Epidemiology								Observational study						Prevalence survey												humans
936		Arbovirus surveillance in bats in Uganda. (conference proceeding- abstract only)	2014	Epidemiology	English	Conference Proceeding						Africa	Uganda	2011-Present	2009-2013			Epidemiology								Observational study						Prevalence survey													host	bats
937		Identification of the first case of imported Zika Fever to the UK: A novel sample type for diagnostic purposes and support for a potential non-vectorborne route of transmission. (conference proceeding- abstract only)	2014	Pathogenesis	English	Conference Proceeding		Europe					United Kingdom	2011-Present	2014/02	Pathogenesis										Observational study								Case study or case-series										humans
938		Virological and serological investigation of the first dengue fever outbreak in Ethiopia. (conference proceeding- abstract only)	2014	Epidemiology	English	Conference Proceeding						Africa	Ethiopia	2011-Present	2013/09			Epidemiology								Observational study						Prevalence survey												humans
946		Evidence of circulation of selected arboviruses in ijara and marigat districts, Kenya. (conference proceeding- abstract only)	2013	Epidemiology	English	Conference Proceeding						Africa	Kenya	2011-Present	NR			Epidemiology								Observational study						Prevalence survey												humans
951		Arbovirus surveillance and virus isolations from bats in Uganda, Kenya, and the democratic republic of the Congo. (conference proceeding- abstract only)	2012		English	Conference Proceeding						Africa	Uganda, Kenya, and the democratic republic of the Congo	2011-Present	2011-2012											Observational study						Prevalence survey													host	bats
952		Seroprevalence of selected arboviruses in ijara and marigat districts,Kenya. (conference proceeding- abstract only)	2012	Epidemiology	English	Conference Proceeding						Africa	Kenya	2011-Present	NR			Epidemiology								Observational study						Prevalence survey												humans
953		Study of arboviruses in archived specimens from acute febrile illness studies in bandung,Indonesia. (conference proceeding- abstract only)	2012		English	Conference Proceeding					Asia		Indonesia	2011-Present	2004-2005			Epidemiology								Observational study						Prevalence survey												humans
957		Investigations into mosquito blood feeding patterns on wildlife and a potential role for bats in arbovirus transmission cycles in Uganda. (conference proceeding- abstract only)	2011		English	Conference Proceeding						Africa	Uganda	2011-Present	NR																														host	bats
1046	E. M. Korhonen,E. Huhtamo,T. Smura,H. Kallio-Kokko,M. Raassina,O. Vapalahti	Zika virus infection in a traveller returning from the Maldives, June 2015	2016	Pathogenesis-Virus Study	English	primary peer-reviewed		Europe					Finland	2011-Present	2015/06	Pathogenesis					Virus Study					Observational study								Case study or case-series										humans
1049	K. Shinohara,S. Kutsuna,T. Takasaki,M. L. Moi,M. Ikeda,A. Kotaki,K. Yamamoto,Y. Fujiya,M. Mawatari,N. Takeshita,K. Hayakawa,S. Kanagawa,Y. Kato,N. Ohmagari	Zika fever imported from Thailand to Japan, and diagnosed by PCR in the urines	2016	Pathogenesis	English	primary peer-reviewed					Asia		Japan	2011-Present	2014/08	Pathogenesis										Observational study								Case study or case-series										humans
1059	W. E. Villamil-Gomez,O. Gonzalez-Camargo,J. Rodriguez-Ayubi,D. Zapata-Serpa,A. J. Rodriguez-Morales	Dengue, chikungunya and Zika co-infection in a patient from Colombia	2016	Pathogenesis	English	primary peer-reviewed				Central America/South America/Caribbean			Colombia	2011-Present	2015	Pathogenesis										Observational study								Case study or case-series										humans
1117	A. T. Pyke,M. T. Daly,J. N. Cameron,P. R. Moore,C. T. Taylor,G. R. Hewitson,J. L. Humphreys,R. Gair	Imported zika virus infection from the cook islands into australia, 2014	2014	Pathogenesis-Virus Study	English	primary peer-reviewed			Australasia				Australia	2011-Present	2014/03	Pathogenesis					Virus Study					Observational study								Case study or case-series										humans
1186	J. Renaudet,C. Jan,J. Ridet,C. Adam,Y. Robin	A serological survey of arboviruses in the human population of Senegal	1978	Epidemiology	French	primary peer-reviewed						Africa	Senegal	1971-1980	1972-1975			Epidemiology								Observational study						Prevalence survey												humans
1198	A. Geser,B. E. Henderson,S. Christensen	A multipurpose serological survey in Kenya. 2. Results of arbovirus serological tests	1970	Epidemiology	English	primary peer-reviewed						Africa	Kenya	1960-1970	1966/11-1968/04			Epidemiology								Observational study						Prevalence survey												humans
1206	R. L. REAGAN,S. C. CHANG,A. L. BRUECKNER	Electron micrographs of erythrocytes from Swiss albino mice infected with Zika virus	1955	Virus Study	English	primary peer-reviewed	North America						United States	Pre 1960	NR						Virus Study						Experimental study														Challenge trial							Animal model
1363	Wilbur G. Downs,Charles R. Anderson,M. Theiler	Neutralizing antibodies against certain viruses in the sera of residents of Trinidad, B.W.I	1965	Epidemiology	English	primary peer-reviewed				Central America/South America/Caribbean			Trinidad	Pre 1960	1953-1953			Epidemiology								Observational study						Prevalence survey												humans
1891	O. A. Babaniyi,P. Mwaba,P. Songolo,M. L. Mazaba-Liwewe,I. Mweene-Ndumba,F. Masaninga,E. Rudatsikira,S. Seroprevalence of Zika virus infection specific IgG in Western and North-Western Provinces of Zambia Siziya		2015	Epidemiology	English	primary peer-reviewed						Africa	Zambia	2011-Present	NR			Epidemiology								Observational study			Cross-sectional															humans
1903	World Health Organization	Epidemiological alert: neurological syndrome, congenital malformations, and Zika virus infection. Implications for public health in the Americas.	2015	Epidemiology	English	Grey Lit - Primary Data				Central America/South America/Caribbean			Brazil	2011-Present	2015/05 - 2015/12/01			Epidemiology								Observational study									Outbreak investigation									humans
1915	World Health Organization	ZIKA VIRUS MICROCEPHALY AND GUILLAIN-BARRÉ SYNDROME. SITUATION REPORT. 19 FEBRUARY 2016	2016	Epidemiology	English	Grey Lit - Primary Data				Central America/South America/Caribbean			Brazil	2011-Present	2015/05 - 2016/02			Epidemiology								Observational study									Outbreak investigation									humans
1916	World Health Organization	ZIKA AND POTENTIAL COMPLICATIONS. SITUATION REPORT. 12 FEBRUARY 2016	2016	Epidemiology	English	Grey Lit - Primary Data				Central America/South America/Caribbean				2011-Present	2015 - 2016/02			Epidemiology								Observational study									Outbreak investigation									humans
1917	World Health Organization	NEUROLOGICAL SYNDROME AND CONGENITAL ANOMALIES . SITUATION REPORT. 5 FEBRUARY 2016	2016	Epidemiology	English	Grey Lit - Primary Data			Australasia	Central America/South America/Caribbean			brazil, colombia, suriname, venezuela, cape verde, french polynesia	2011-Present	2015-2016/02			Epidemiology								Observational study									Outbreak investigation									humans
1918	World Health Organization	Zika virus infection – United States of America Disease Outbreak News 12 February 2016	2016	Pathogenesis-Transmission	English	Grey Lit - Primary Data	North America						United States	2011-Present	2016/02/05	Pathogenesis			Transmission							Observational study								Case study or case-series										humans
1919	World Health Organization	Zika virus infection – Region of the Americas Disease Outbreak News 8 February 2016	2016	Pathogenesis	English	Grey Lit - Primary Data				Central America/South America/Caribbean			Costa Rica, Curacao, Jamaica, Nicaragua	2011-Present	2016/01/27-30	Pathogenesis										Observational study									Outbreak investigation									humans
1920	World Health Organization	Zika virus infection – United States of America ­ United States Virgin Islands Disease Outbreak News 29 January 2016	2016	Pathogenesis	English	Grey Lit - Primary Data				Central America/South America/Caribbean			Virgin Islands (US )	2011-Present	2016/01/25	Pathogenesis										Observational study								Case study or case-series										humans
1921	World Health Organization	Zika virus infection – Dominican Republic Disease Outbreak News 27 January 2016	2016	Pathogenesis	English	Grey Lit - Primary Data				Central America/South America/Caribbean			Dominican Republic	2011-Present	2016/01/23	Pathogenesis										Observational study									Outbreak investigation									humans
1922	World Health Organization	Zika virus infection – France - Saint Martin and Guadeloupe Disease Outbreak News 21 January 2016	2016	Epidemiology	English	Grey Lit - Primary Data				Central America/South America/Caribbean			Saint Martin and Guadeloupe	2011-Present	2016/01/21			Epidemiology								Observational study									Outbreak investigation									humans
1923	World Health Organization	Zika virus infection – Haiti Disease Outbreak News 21 January 2016	2016	Pathogenesis	English	Grey Lit - Primary Data				Central America/South America/Caribbean			Haiti	2011-Present	2016/01/18	Pathogenesis		Epidemiology								Observational study									Outbreak investigation									humans
1924	World Health Organization	Zika virus infection – Bolivia Disease Outbreak News 20 January 2016	2016	Pathogenesis	English	Grey Lit - Primary Data				Central America/South America/Caribbean			Bolivia	2011-Present	2016/01/08	Pathogenesis										Observational study									Outbreak investigation									humans
1925	World Health Organization	Zika virus infection – Guyana, Barbados and Ecuador Disease Outbreak News 20 January 2016	2016	Pathogenesis	English	Grey Lit - Primary Data				Central America/South America/Caribbean			Guyana and Barbados and Ecuador	2011-Present	2016/01/14-15	Pathogenesis		Epidemiology								Observational study									Outbreak investigation									humans
1926	World Health Organization	Zika virus infection – United States of America - Puerto Rico Disease Outbreak News 8 January 2016	2016	Pathogenesis	English	Grey Lit - Primary Data				Central America/South America/Caribbean			Puerto Rico	2011-Present	2015/12/31	Pathogenesis		Epidemiology								Observational study									Outbreak investigation									humans
1927	World Health Organization	Zika virus infection – France - French Guiana and Martinique Disease Outbreak News 8 January 2016	2016	Pathogenesis	English	Grey Lit - Primary Data				Central America/South America/Caribbean			French Guiana and Martinique	2011-Present	2015/12/21	Pathogenesis		Epidemiology								Observational study									Outbreak investigation									humans
1928	World Health Organization	Zika virus infection – Panama Disease Outbreak News 22 December 2015	2015	Pathogenesis-Epidemiology	English	Grey Lit - Primary Data				Central America/South America/Caribbean			Panama	2011-Present	2015/12/14	Pathogenesis		Epidemiology								Observational study									Outbreak investigation									humans
1929	World Health Organization	Zika virus infection – Honduras Disease Outbreak News 21 December 2015	2015	Pathogenesis	English	Grey Lit - Primary Data				Central America/South America/Caribbean			Honduras	2011-Present	2015/12/21	Pathogenesis		Epidemiology								Observational study									Outbreak investigation									humans
1930	World Health Organization	Zika virus infection – Cape Verde Disease Outbreak News 21 December 2015	2015	Epidemiology	English	Grey Lit - Primary Data						Africa	Cape Verde	2011-Present	2015/09/27 - 2015/10/15			Epidemiology								Observational study									Outbreak investigation									humans
1931	World Health Organization	Zika virus infection – Panama Disease Outbreak News 5 December 2015	2015	Epidemiology	English	Grey Lit - Primary Data				Central America/South America/Caribbean			Panama	2011-Present	2015/11/27			Epidemiology								Observational study									Outbreak investigation									humans
1932	World Health Organization	Zika virus infection – Venezuela Disease Outbreak News 3 December 2015	2015	Epidemiology	English	Grey Lit - Primary Data				Central America/South America/Caribbean			Venezuela	2011-Present	2015/11/27			Epidemiology								Observational study									Outbreak investigation									humans
1933	World Health Organization	Zika virus infection – Mexico Disease Outbreak News 3 December 2015	2015	Epidemiology	English	Grey Lit - Primary Data				Central America/South America/Caribbean			Mexico	2011-Present	2015/11/26			Epidemiology								Observational study									Outbreak investigation									humans
1934	World Health Organization	Zika virus infection – Paraguay Disease Outbreak News 3 December 2015	2015	Pathogenesis-Epidemiology	English	Grey Lit - Primary Data				Central America/South America/Caribbean			Paraguay	2011-Present	2015/11/27	Pathogenesis		Epidemiology								Observational study									Outbreak investigation									humans
1935	World Health Organization	Zika virus infection – Guatemala Disease Outbreak News 27 November 2015	2015	Epidemiology	English	Grey Lit - Primary Data				Central America/South America/Caribbean			Guatemala	2011-Present	2015/11/27			Epidemiology								Observational study									Outbreak investigation									humans
1936	World Health Organization	Zika virus infection – El Salvador Disease Outbreak News 27 November 2015	2015	Epidemiology	English	Grey Lit - Primary Data				Central America/South America/Caribbean			El Salvador	2011-Present	2015/11/24			Epidemiology								Observational study									Outbreak investigation									humans
1937	World Health Organization	Zika virus infection – Suriname Disease Outbreak News 13 November 2015	2015	Epidemiology	English	Grey Lit - Primary Data				Central America/South America/Caribbean			Suriname	2011-Present	2015/11/12			Epidemiology								Observational study									Outbreak investigation									humans
1938	World Health Organization	Zika virus infection – Suriname Disease Outbreak News 11 November 2015	2015	Epidemiology	English	Grey Lit - Primary Data				Central America/South America/Caribbean			Suriname	2011-Present	2015/11/2			Epidemiology								Observational study									Outbreak investigation									humans
1939	World Health Organization	Zika virus infection – Brazil and Colombia Disease Outbreak News 21 October 2015	2015	Epidemiology	English	Grey Lit - Primary Data				Central America/South America/Caribbean			Brazil and Colombia	2011-Present	2015/01-2015/10/16			Epidemiology								Observational study									Outbreak investigation									humans
1940	World Health Organization	Microcephaly – United States of America Disease Outbreak News 12 February 2016	2016	Pathogenesis	English	Grey Lit - Primary Data	North America						United States	2011-Present	2016/01/16	Pathogenesis										Observational study								Case study or case-series										humans
1942	World Health Organization	Microcephaly – Brazil Disease Outbreak News 15 December 2015	2015	Epidemiology	English	Grey Lit - Primary Data				Central America/South America/Caribbean			Brazil	2011-Present	2015/12/5			Epidemiology								Observational study									Outbreak investigation									humans
1943	World Health Organization	Microcephaly – Brazil Disease Outbreak News 27 November 2015	2015	Epidemiology	English	Grey Lit - Primary Data				Central America/South America/Caribbean			Brazil	2011-Present	2015/11/21			Epidemiology								Observational study									Outbreak investigation									humans
1945	World Health Organization	Guillain-Barré syndrome – Colombia and Venezuela Disease Outbreak News 12 February 2016	2016	Epidemiology	English	Grey Lit - Primary Data				Central America/South America/Caribbean			Colombia and Venezuela	2011-Present	2016/01/30- 2016/02/02			Epidemiology								Observational study									Outbreak investigation									humans
1946	World Health Organization	Guillain-Barré syndrome – Brazil Disease Outbreak News 8 February 2016	2016	Epidemiology	English	Grey Lit - Primary Data				Central America/South America/Caribbean			Brazil	2011-Present	2016/01/22			Epidemiology								Observational study									Outbreak investigation									humans
1947	World Health Organization	Guillain-Barré syndrome – France - Martinique Disease Outbreak News 8 February 2016	2016	Pathogenesis	English	Grey Lit - Primary Data				Central America/South America/Caribbean			Martinique	2011-Present	2016/01/25	Pathogenesis										Observational study									Outbreak investigation									humans
1948	World Health Organization	Guillain-Barré syndrome – El Salvador Disease Outbreak News 21 January 2016	2016	Epidemiology	English	Grey Lit - Primary Data				Central America/South America/Caribbean			El Salvador	2011-Present	2015/12/01 - 2016/01/06			Epidemiology								Observational study									Outbreak investigation									humans
1951	Pan American Health Organization	Zika Epidemiological Update - 17 February 2016	2016	Epidemiology	English	Grey Lit - Primary Data		Europe		Central America/South America/Caribbean			Slovenia, Brazil, Columbia, El Salvador	2011-Present	2016/02/17			Epidemiology								Observational study									Outbreak investigation									humans
1953	R. B. Martines,J. Bhatnagar,M. K. Keating,L. Silva-Flannery,A. Muehlenbachs,J. Gary,C. Goldsmith,G. Hale,J. Ritter,D. Rollin,W. J. Shieh,K. G. Luz,A. M. Ramos,H. P. Davi,W. Kleber de Oliveria,R. Lanciotti,A. Lambert,S. Zaki	Notes from the Field: Evidence of Zika Virus Infection in Brain and Placental Tissues from Two Congenitally Infected Newborns and Two Fetal Losses - Brazil, 2015	2016	Pathogenesis	English	primary peer-reviewed				Central America/South America/Caribbean			Brazil / United States	2011-Present	2015	Pathogenesis										Observational study								Case study or case-series										humans
1954	J. Mlakar,M. Korva,N. Tul,M. Popovic,M. Poljsak-Prijatelj,J. Mraz,M. Kolenc,K. Resman Rus,T. Vesnaver Vipotnik,V. Fabjan Vodusek,A. Vizjak,J. Pizem,M. Petrovec,T. Avsic Zupanc	Zika Virus Associated with Microcephaly	2016	Pathogenesis-Virus Study	English	primary peer-reviewed		Europe					Slovenia	2011-Present	2015/10	Pathogenesis					Virus Study					Observational study								Case study or case-series										humans
1956	Pan American Health Organization	Reported increase of congenital microcephaly and other central nervous system symptoms - 10 February 2016	2016	Epidemiology	English	Grey Lit - Primary Data	North America			Central America/South America/Caribbean			Brazil, Colombia, El Salvador, Guadeloupe, Martinique, Suriname, Venezuela, United States	2011-Present	2016/02/10			Epidemiology								Observational study									Outbreak investigation									humans
1957	Pan American Health Organization	Epidemiological Update Neurological syndrome, congenital anomalies, and Zika virus infection 17 January 2016	2016	Epidemiology-Transmission	English	Grey Lit - Primary Data			Australasia	Central America/South America/Caribbean			French Polynesia, Brazil, El Salvador	2011-Present	2014 - 2016			Epidemiology	Transmission							Observational study									Outbreak investigation									humans
1958	Pan American Health Organization	Epidemiological Alert Neurological syndrome, congenital malformations, and Zika virus infection. Implications for public health in the Americas 1 December 2015	2015	Epidemiology	English	Grey Lit - Primary Data			Australasia	Central America/South America/Caribbean			Brazil, French Polynesia,	2011-Present	2012- 2015			Epidemiology								Observational study									Outbreak investigation									humans
1974	L. Arzuza-Ortega,A. Polo,G. Pérez-Tatis,H. López-García,E. Parra,L. C. Pardo-Herrera	Fatal Zika virus infection in girl with sickle cell disease, Colombia [letter]	2016	Pathogenesis-Epidemiology	English	primary peer-reviewed				Central America/South America/Caribbean			Colombia	2011-Present	2015/10	Pathogenesis		Epidemiology								Observational study								Case study or case-series										humans
1975	Erwin Camacho,Margaret Paternina-Gomez,Pedro J. Blanco,Jorge E. Osorio,Matthew T. Aliota	Detection of Autochthonous Zika Virus Transmission in Sincelejo, Colombia	2016	Epidemiology-Virus Study	English	primary peer-reviewed				Central America/South America/Caribbean			Colombia	2011-Present	2015/10 - 2015/11			Epidemiology			Virus Study					Observational study									Outbreak investigation									humans
1976	Aditya Perkasa,Frilasita Yudhaputri,Sotianingsih Haryanto,Rahma F. Hayati,Nisa Ma Chairin,Ungke Antonjaya,Benediktus Yohan,Aye Myint Khin Saw,Jeremy P. Ledermann,Ronald Rosenberg,Ann M. Powers,R. Tedjo Sasmono	Isolation of Zika Virus from Febrile Patient, Indonesia	2016	Pathogenesis-Epidemiology-Virus Study	English	primary peer-reviewed					Asia		Indonesia	2011-Present	2014/12-2015/04	Pathogenesis		Epidemiology			Virus Study					Observational study								Case study or case-series										humans
1978	D. L. Thomas,T. M. Sharp,J. Torres,P. A. Armstrong,J. Munoz-Jordan,K. R. Ryff,A. Martinez-Quinones,J. Arias-Berrios,M. Mayshack,G. J. Garayalde,S. Saavedra,C. A. Luciano,M. Valencia-Prado,S. Waterman,B. Rivera-Garcia	Local Transmission of Zika Virus - Puerto Rico, November 23, 2015-January 28, 2016	2016	Pathogenesis-Epidemiology-Surveillance	English	primary peer-reviewed				Central America/South America/Caribbean			Puerto Rico	2011-Present	2015/11/23-2016/01/28	Pathogenesis		Epidemiology		Surveillance						Observational study									Outbreak investigation									humans
1980	L. Schuler-Faccini,E. M. Ribeiro,I. M. Feitosa,D. D. Horovitz,D. P. Cavalcanti,A. Pessoa,M. J. Doriqui,J. I. Neri,J. M. Neto,H. Y. Wanderley,M. Cernach,A. S. El-Husny,M. V. Pone,C. L. Serao,M. T. Sanseverino,Brazilian Medical Genetics Society-Zika Embryopathy Task Force	Possible Association Between Zika Virus Infection and Microcephaly - Brazil, 2015	2016	Pathogenesis-Surveillance	English	primary peer-reviewed				Central America/South America/Caribbean			Brazil	2011-Present	2015/08 - 2015/10	Pathogenesis				Surveillance						Observational study				Cohort														humans
1983	G. Calvet,R. S. Aguiar,A. S. Melo,S. A. Sampaio,I. de Filippis,A. Fabri,E. S. Araujo,P. C. de Sequeira,M. C. de Mendonca,L. de Oliveira,D. A. Tschoeke,C. G. Schrago,F. L. Thompson,P. Brasil,F. B. Dos Santos,R. M. Nogueira,A. Tanuri,A. M. de Filippis	Detection and sequencing of Zika virus from amniotic fluid of fetuses with microcephaly in Brazil: a case study	2016	Pathogenesis-Transmission-Virus Study	English	primary peer-reviewed				Central America/South America/Caribbean			Brazil	2011-Present	2015	Pathogenesis			Transmission		Virus Study					Observational study								Case study or case-series										humans
1985	B. Freitas,J. Oliveira Dias,J. Prazeres	Ocular Findings in Infants With Microcephaly Associated With Presumed Zika Virus Congenital Infection in Salvador, Brazil	2016	Pathogenesis	English	primary peer-reviewed				Central America/South America/Caribbean			Brazil	2011-Present	2015/12/01 - 2015/12/21	Pathogenesis										Observational study								Case study or case-series										humans
1990	Agence Regionale de Sante	Emergence du virus Zika aux Antilles Guyane. Situation épidémiologique Point épidémiologique du 21 janvier - N°3 / 2016	2016	Epidemiology	French	Grey Lit - Primary Data				Central America/South America/Caribbean			Guadeloupe, Guyane, Martinique, St. Barthelemy, St. Martin	2011-Present	1015/11/23 - 2016/01/21			Epidemiology								Observational study									Outbreak investigation									humans
1992	Agence Regionale de Sante	Emergence des maladies infectieuses. Bulletin de veille sanitaire. no2 Jun-Aug 2014	2014	Pathogenesis-Epidemiology	French	Grey Lit - Primary Data			Australasia				French Polynesia	2011-Present	2014/06	Pathogenesis		Epidemiology								Observational study									Outbreak investigation									humans
1998	A. ZIKA VIRUS - NETHERLANDS ex SURINAME Goorhuis		2015	Pathogenesis	English	Grey Lit - Primary Data		Europe					Netherlands	2011-Present	2015/12/2	Pathogenesis										Observational study								Case study or case-series										humans
1999	A. T. De Madrid,J. S. Porterfield	The flaviviruses (group B arboviruses): a cross-neutralization study	1974	Diagnostic Tests	English	primary peer-reviewed		Europe					England	1971-1980	1973		Diagnostic Tests										Experimental study														Challenge trial								Virus only
2000	A. T. De Madrid,J. S. Porterfield	A simple micro-culture method for the study of group B arboviruses	1969	Diagnostic Tests	English	primary peer-reviewed		Europe					England	1960-1970	1969		Diagnostic Tests										Experimental study														Challenge trial								Virus only
2002	ROC (Taiwan) Center for Disease Control	As first imported case of Zika virus infection identified in Taiwan, Taiwan CDC to list Zika virus infection as Category II Notifiable Infectious Disease and raises travel notice level for Central and South America and six countries in Southeast Asia( 2016-01-19	2016	Pathogenesis	English	Grey Lit - Primary Data					Asia		Taiwan (ROC)	2011-Present	2016/01/10	Pathogenesis										Observational study								Case study or case-series										humans
2003	C. C. M. Freire,A. lamarino,D. F. Neto,A. A. Sall,P. M. A. Zanotto	Spread of the pandemic Zika virus lineage is associated with NS1 codon usage adaptation in humans	2015	Virus Study	English	primary peer-reviewed				Central America/South America/Caribbean			Brazil	2011-Present	2016						Virus Study					Observational study																Other, specify:	molecular epi						Virus only
2006	B. HENDERSON,P. CHESHIRE,G. KIRYA,M. Immunologic Studies with Yellow Fever and Selected African Group B Arboviruses in Rhesus and Vervet Monkeys LULE		1970	Virus Study	English	primary peer-reviewed						Africa	Uganda	1960-1970	1970						Virus Study						Experimental study														Challenge trial							Animal model
2008	Institut de Veille Sanitaire	Bulletin Hebdomadaire International N°442, 05 au 11 mars 2014	2014	Epidemiology	French	Grey Lit - Primary Data			Australasia				Cook islands, Easter Island (Chile), French Polynesia, New Caledonia	2011-Present	2014/03/11			Epidemiology								Observational study									Outbreak investigation									humans
2009	H. P. Emergence du virus Zika en Polynésie française Mallet		2014	Pathogenesis-Epidemiology-Surveillance	French	Grey Lit - Primary Data			Australasia				French Polynesia	2011-Present	2013/10- 2014	Pathogenesis		Epidemiology		Surveillance						Observational study									Outbreak investigation									humans
2015	P. Millon	Epidemiologie des syndromes de Gullain-Barre en Nouvelle-Caledonie entre 2011 et 2014: influence des arboviroses	2015	Epidemiology	French	Thesis			Australasia				New Caledonia	2011-Present	2011/01/01 - 2014/12/31			Epidemiology								Observational study								Case study or case-series										humans
2016	Institut de Veille Sanitaire	Virus Zika Polynesie 2013-2014, Isle de yap, Micronesia 2007 (janvier 2014)	2014	Pathogenesis-Epidemiology	English	Grey Lit - Primary Data			Australasia				Yap Island and French Polynesia	2011-Present	2007/04/01 - 2007/08/09 and 2013/10/31 - 2014/01	Pathogenesis		Epidemiology								Observational study									Outbreak investigation									humans
2019	G. Kuno,G. J. Chang,K. R. Tsuchiya,N. Karabatsos,C. B. Cropp	Phylogeny of the genus Flavivirus	1998	Virus Study	English	primary peer-reviewed	North America						United States	1991-2000	1998						Virus Study					Observational study												Other, specify:	molecular study										Virus only
2020	H. p. Mallet,A. L. Vial,D. Musso		2015	Pathogenesis-Epidemiology	French	Grey Lit - Primary Data			Australasia				French Polynesia	2011-Present	2013/10/30 - 2014	Pathogenesis		Epidemiology								Observational study							Surveillance or monitoring program											humans
2022	Rockefeller Foundation	Rockefeller Foundation Annual Report. Zika pages 131-140	1951	Epidemiology-Virus Study	English	primary peer-reviewed						Africa	Uganda and Tanzania	Pre 1960	1951			Epidemiology			Virus Study					Observational study						Prevalence survey												humans				Animal model	Virus only
2023	Direction de la santé Bureau de veille sanitaire Surveillance et veille sanitaire en Polynésie française. Données du 01 au 07 Février 2016 ( Semaine 05)		2016	Epidemiology	French	Grey Lit - Primary Data			Australasia				American Samoa	2011-Present	2016/02/07			Epidemiology								Observational study									Outbreak investigation									humans
2024	Direction de la Santé - Bureau de Veille sanitaire Surveillance de la dengue et du zika en Polynésie française. Données actualisées au 14 février 2014		2014	Epidemiology	French	Grey Lit - Primary Data			Australasia				French Polynesia	2011-Present	2013/10 - 2014/02/14			Epidemiology								Observational study							Surveillance or monitoring program											humans
2025	ending 16 August World Health Organization Pacific syndromic surveillance report. Week 33		2015	Epidemiology	English	Grey Lit - Primary Data			Australasia				Fiji	2011-Present	2015/08/16			Epidemiology								Observational study								Case study or case-series										humans
2026	ending 26 April World Health Organization Pacific syndromic surveillance report. Week 17		2015	Epidemiology	English	Grey Lit - Primary Data			Australasia				Vanuatu and Solomon Islands	2011-Present	2015/04/26			Epidemiology								Observational study									Outbreak investigation									humans
2031	R. de M Campos,C. Cirne-Santos,G. L. Meira,L. L. Santos,M. D. de Meneses,J. Friedrich,S. Jansen,M. S. Ribeiro,I. C. da Cruz,J. Schmidt-Chanasit,D. F. Ferreira	Prolonged detection of Zika virus RNA in urine samples during the ongoing Zika virus epidemic in Brazil	2016	Diagnostic Tests	English	primary peer-reviewed				Central America/South America/Caribbean			Brazil	2011-Present	2016		Diagnostic Tests									Observational study				Cohort														humans
2035	N. Wikan,Y. Suputtamongkol,S. Yoksan,D. R. Smith,P. Auewarakul	Immunological evidence of Zika virus transmission in Thailand	2016	Epidemiology	English	primary peer-reviewed					Asia		Thailand	2011-Present	NR			Epidemiology								Observational study						Prevalence survey												humans
2046	M. Sarno,G. A. Sacramento,R. Khouri,M. S. do Rosario,F. Costa,G. Archanjo,L. A. Santos,N. Nery,N. Vasilakis,A. I. Ko,A. R. de Almeida	Zika Virus Infection and Stillbirths: A Case of Hydrops Fetalis, Hydranencephaly and Fetal Demise	2016	Pathogenesis	English	primary peer-reviewed				Central America/South America/Caribbean			Brazil	2011-Present	2016	Pathogenesis										Observational study								Case study or case-series										humans
2054	O. Karimi,A. Goorhuis,J. Schinkel,J. Codrington,S. G. Vreden,J. S. Vermaat,C. Stijnis,M. P. Grobusch	Thrombocytopenia and subcutaneous bleedings in a patient with Zika virus infection	2016	Pathogenesis	English	primary peer-reviewed		Europe					Netherlands	2011-Present	2016/01	Pathogenesis										Observational study								Case study or case-series										humans
2061	A. T. Maria,M. Maquart,A. Makinson,O. Flusin,M. Segondy,I. Leparc-Goffart,V. Le Moing,V. Foulongne	Zika virus infections in three travellers returning from South America and the Caribbean respectively, to Montpellier, France, December 2015 to January 2016	2016	Pathogenesis-Diagnostic Tests	English	primary peer-reviewed		Europe					France	2011-Present	2015/12 -2016/01	Pathogenesis	Diagnostic Tests									Observational study								Case study or case-series										humans
2074	T. Weitzel,C. P. Cortes	Zika Virus Infection Presenting with Postauricular Lymphadenopathy	2016	Pathogenesis	English	primary peer-reviewed				Central America/South America/Caribbean			Chile	2011-Present	2015/12	Pathogenesis										Observational study								Case study or case-series										humans
2089	L. H. Chen	Zika Virus Infection in a Massachusetts Resident After Travel to Costa Rica: A Case Report	2016	Pathogenesis	English	primary peer-reviewed	North America						United States	2011-Present	2016/01/02	Pathogenesis										Observational study								Case study or case-series										humans
2096	D. Gyurech,J. Schilling,J. Schmidt-Chanasit,P. Cassinotti,F. Kaeppeli,M. Dobec	False positive dengue NS1 antigen test in a traveller with an acute Zika virus infection imported into Switzerland	2016	Pathogenesis	English	primary peer-reviewed		Europe					Switzerland	2011-Present	2015/06/08	Pathogenesis										Observational study								Case study or case-series										humans
2111	B. M. Fontes	Zika virus-related hypertensive iridocyclitis	2016	Pathogenesis	English	primary peer-reviewed				Central America/South America/Caribbean			Brazil	2011-Present	2016	Pathogenesis										Observational study								Case study or case-series										humans
2112	C. V. Ventura,M. Maia,B. V. Ventura,V. V. Linden,E. B. Araujo,R. C. Ramos,M. A. Rocha,M. D. Carvalho,R. Belfort,L. O. Ventura	Ophthalmological findings in infants with microcephaly and presumable intra-uterus Zika virus infection	2016	Pathogenesis	English	primary peer-reviewed				Central America/South America/Caribbean			Brazil	2011-Present	2015/12	Pathogenesis										Observational study								Case study or case-series										humans
2121	A. Sow,C. Loucoubar,D. Diallo,O. Faye,Y. Ndiaye,C. S. Senghor,A. T. Dia,O. Faye,S. C. Weaver,M. Diallo,D. Malvy,A. A. Sall	Concurrent malaria and arbovirus infections in Kedougou, southeastern Senegal	2016	Epidemiology	English	primary peer-reviewed						Africa	Senegal	2011-Present	2009/07 - 2013/03			Epidemiology		Surveillance						Observational study							Surveillance or monitoring program											humans
2232	Cesar Gomes Victora,Lavinia Schuler-Faccini,Alicia Matijasevich,Erlane Ribeiro,André Pessoa,Fernando Celso Barros	Microcephaly in Brazil: how to interpret reported numbers?	2016	Epidemiology	English	primary peer-reviewed				Central America/South America/Caribbean			Brazil	2011-Present	2016			Epidemiology								Observational study											diagnostic test evaluation							humans
2333	J. Araújo,C. T. Regis,R. G. Gomes,T. R. Tavares,C. R. Santos,P. M. Assunção,R. V. Nóbrega,D. F. Pinto,B. V. Bezerrab,S. Mattos	Microcephaly in northeastern Brazil: a review of 16 208 births between 2012 and 2015	2016	Epidemiology	English	primary peer-reviewed				Central America/South America/Caribbean			Brazil	2011-Present	2012/01/01- 2015/12/31			Epidemiology								Observational study			Cross-sectional															humans
2335	G. Venturi,L. Zammarchi,C. Fortuna,M. E. Remoli,E. benedetti,C. Florentini,M. Trotta,C. Rizzo,A. Mantella,G. Rezza,A. Bartoloni	An Autochthonous case of zika due to possible sexual transmission, Florence, Italy, 2014	2016	Pathogenesis-Transmission	English	primary peer-reviewed		Europe					Italy	2011-Present	2014/05	Pathogenesis			Transmission							Observational study								Case study or case-series										humans
2336	D. Meaney-Delman,S. l. Hills,C. Williams,R. R. Galang,P. Iyengar,A. K. Hennenfent,I. B. Rabe,A. Panella,T. Oduyebo,M. A. Honein,S. Zaki,S. Lindsey,J. A. Lehman,N. Kwit,J. Bertolli,S. Ellington,I. Igbinosa,A. A. Minta,E. E. Petersen,P. Mead,S. A. Rasmussen,D. J. Jamieson	Zika Virus Infection Among U.S. Pregnant Travelers — August 2015–February 2016	2016	Pathogenesis-Epidemiology	English	primary peer-reviewed	North America						United States	2011-Present	2015/08/01 - 2016/02/07	Pathogenesis		Epidemiology								Observational study								Case study or case-series										humans
2337	UK government	Health Protection Report: volume 10, issue 8, News February 26th. Zika epidemiological update	2016	Epidemiology	English	Grey Lit - Primary Data		Europe					Austria, Czech Republic, Denmark, finland, France, Germany, Ireland, Italy, Malta, Netherlands, Portugal, Spain, Sweden, Slovenia, UK	2011-Present	2016/02/25			Epidemiology								Observational study								Case study or case-series										humans
2579	Lobo J. De Araujo,Bausch D.G.,Mores C.N.	Serological evidence of co-circulating dengue virus serotypes, an underreported arboviral disease in Guinea	2010	Epidemiology	English	Conference Proceeding						Africa	Guinea	2001-2010	2010			Epidemiology								Observational study						Prevalence survey												humans
2918	R. S. Lanciotti,A. J. Lambert,M. Holodniy,S. Saavedra,del Carmen Castillo Signor L.	Phylogeny of Zika virus inWestern Hemisphere,2015 [letter].	2016	Virus Study	English	primary peer-reviewed				Central America/South America/Caribbean			Guatemala and Puerto Rico	2011-Present	2016						Virus Study					Observational study												Other, specify:	molecular epi					humans
2920	J. M. Jouannic,S. Friszer,I. Leparc-Goffart,C. Garel,D. Eyrolle-Guignot	Zika virus infection in French Polynesia	2016	Pathogenesis-Epidemiology	English	primary peer-reviewed			Australasia				French Polynesia	2011-Present	2013/09-2014/03	Pathogenesis		Epidemiology								Observational study							Surveillance or monitoring program											humans
2921	V. M. Cao-Lormeau,A. Blake,S. Mons,S. Lastere,C. Roche,J. Vanhomwegen,T. Dub,L. Baudouin,A. Teissier,P. Larre,A. L. Vial,C. Decam,V. Choumet,S. K. Halstead,H. J. Willison,L. Musset,J. C. Manuguerra,P. Despres,E. Fournier,H. P. Mallet,D. Musso,A. Fontanet,J. Neil,F. Ghawche	Guillain-Barre Syndrome outbreak associated with Zika virus infection in French Polynesia: a case-control study	2016	Pathogenesis-Epidemiology	English	primary peer-reviewed			Australasia				French Polynesia	2011-Present	2013/10 - 2014/04	Pathogenesis		Epidemiology								Observational study					Case-control													humans
2922	M. Dupont-Rouzeyrol,A. Biron,O. O'Connor,E. Huguon,E. Descloux	Infectious Zika viral particles in breastmilk	2016	Pathogenesis	English	primary peer-reviewed			Australasia				New Caledonia	2011-Present	2015/07	Pathogenesis										Observational study								Case study or case-series										humans
2926	Western Pacific Region World Health Organization	Pacific Syndromic Surveillance: Week 22, ending 31 May, 2015	2015	Epidemiology	English	Grey Lit - Primary Data			Australasia				Solomon Islands	2011-Present	2015/02 - 2015/05/24 on-going			Epidemiology								Observational study									Outbreak investigation									humans
2927	Western Pacific Region World Health Organization	Pacific Syndromic Surveillance: Week 49, ending 6 Dec, 2015	2015	Epidemiology	English	Grey Lit - Primary Data			Australasia	Central America/South America/Caribbean			"cases reported from" : Brazil, Chile (on Easter Island), Colombia, El Salvador, Guatemala, Mexico, Paraguay, Suriname, and Venezuela. French Polynesia in 2013­14, New Caledonia in 2014, and recently in Cook Islands, Solomon Islands, Vanuatu, Fiji and Samoa in 2015	2011-Present	2013- 2015/12/06			Epidemiology								Observational study									Outbreak investigation									humans
2928	Western Pacific Region World Health Organization	Pacific Syndromic Surveillance: Week 4, ending 31 Jan, 2016	2016	Epidemiology	English	Grey Lit - Primary Data			Australasia				Tonga, New Zealand (traveler)	2011-Present	2016/01/31			Epidemiology								Observational study								Case study or case-series	Outbreak investigation									humans
2929	Western Pacific Region World Health Organization	Pacific Syndromic Surveillance: Week 5, ending 7 Feb, 2016	2016	Epidemiology	English	Grey Lit - Primary Data			Australasia	Central America/South America/Caribbean			Tonga, Brazil	2011-Present	2016/02/7 "up to"			Epidemiology								Observational study									Outbreak investigation									humans
2930	Western Pacific Region World Health Organization	Pacific Syndromic Surveillance: Week 6, ending 14 Feb, 2016	2016	Epidemiology	English	Grey Lit - Primary Data			Australasia				Marshall Islands, Fiji, Tonga and American Samoa	2011-Present	2016/02/14 up to			Epidemiology								Observational study									Outbreak investigation									humans
2931	Western Pacific Region World Health Organization	Pacific Syndromic Surveillance: Week 7, ending 21 Feb, 2016	2016	Epidemiology	English	Grey Lit - Primary Data			Australasia				American Samoa	2011-Present	2016/02/21			Epidemiology								Observational study									Outbreak investigation									humans
2933	Western Pacific Region World Health Organization	Pacific Syndromic Surveillance: Week 12, ending 22 Mar, 2015	2015	Epidemiology	English	Grey Lit - Primary Data			Australasia				New Caledonia and Solomon Is.	2011-Present	2015/03			Epidemiology								Observational study									Outbreak investigation									humans
2934	Western Pacific Region World Health Organization	Pacific Syndromic Surveillance: Week 14, ending 5 Apr, 2015	2015	Epidemiology	English	Grey Lit - Primary Data			Australasia				Solomon Is.	2011-Present				Epidemiology								Observational study									Outbreak investigation									humans
2935	Western Pacific Region World Health Organization	Pacific Syndromic Surveillance: Week 16, ending 19 Apr, 2015	2015	Epidemiology	English	Grey Lit - Primary Data			Australasia				Solomon Islands	2011-Present	2015/02 - 2015/04/15			Epidemiology								Observational study									Outbreak investigation									humans
2936	Western Pacific Region World Health Organization	Pacific Syndromic Surveillance: Week 17, ending 22 Apr, 2015	2015	Epidemiology	English	Grey Lit - Primary Data			Australasia				Vanuatu, Solomon Islands,	2011-Present	2015/04/26 (up to)			Epidemiology								Observational study									Outbreak investigation									humans
2937	Western Pacific Region World Health Organization	Pacific Syndromic Surveillance: Week 17, ending 27 Apr, 2014	2014	Epidemiology	English	Grey Lit - Primary Data			Australasia				New Caledonia, French Polynesia and Cook Islands	2011-Present	2013/09 - 2014/04/29			Epidemiology								Observational study									Outbreak investigation									humans
2938	Western Pacific Region World Health Organization	Pacific Syndromic Surveillance: Week 18, ending 3 May, 2015	2015	Epidemiology	English	Grey Lit - Primary Data			Australasia				Solomon Islands	2011-Present	2015/02 - 2015/05/03			Epidemiology								Observational study									Outbreak investigation									humans
2939	Western Pacific Region World Health Organization	Pacific Syndromic Surveillance: Week 19, ending 10 May, 2015	2015	Epidemiology	English	Grey Lit - Primary Data			Australasia				Solomon Islands	2011-Present	2015/02 - 2015/05/03			Epidemiology								Observational study									Outbreak investigation									humans
2940	Western Pacific Region World Health Organization	Pacific Syndromic Surveillance: Week 20, ending 17 May, 2015	2015	Epidemiology	English	Grey Lit - Primary Data			Australasia				Solomon Islands, Penama, Angoro, Vanuatu	2011-Present	2015/02 - 2015/05/10			Epidemiology								Observational study									Outbreak investigation									humans
2941	Western Pacific Region World Health Organization	Pacific Syndromic Surveillance: Week 20, ending 18 May, 2014	2014	Epidemiology	English	Grey Lit - Primary Data			Australasia				Cook Islands	2011-Present	2014/02/13 - 2014/05/18			Epidemiology								Observational study									Outbreak investigation									humans
2942	Western Pacific Region World Health Organization	Pacific Syndromic Surveillance: Week 21, ending 24 May, 2015	2015	Epidemiology	English	Grey Lit - Primary Data			Australasia				Solomon Islands	2011-Present	2015/02 - 2015/05/17			Epidemiology								Observational study									Outbreak investigation									humans
2943	Western Pacific Region World Health Organization	Pacific Syndromic Surveillance: Week 21, ending 25 May, 2014	2014	Epidemiology	English	Grey Lit - Primary Data			Australasia				New Caledonia, Cook Islands	2011-Present	2013/11 - 2014/05/07			Epidemiology								Observational study									Outbreak investigation									humans
2944	Western Pacific Region World Health Organization	Pacific Syndromic Surveillance: Week 24, ending 15 Jun, 2014	2014	Epidemiology	English	Grey Lit - Primary Data			Australasia				New Caledonia	2011-Present	2013/11 - 2014/06/06			Epidemiology								Observational study									Outbreak investigation									humans
2946	Western Pacific Region World Health Organization	Pacific Syndromic Surveillance: Week 30, ending 27 Jul, 2014	2014	Epidemiology	English	Grey Lit - Primary Data			Australasia				New Caledonia	2011-Present	2013/11 - 2014/07/28			Epidemiology								Observational study									Outbreak investigation									humans
2947	Western Pacific Region World Health Organization	Pacific Syndromic Surveillance: Week 37, ending 13 Sep, 2015	2015	Epidemiology	English	Grey Lit - Primary Data			Australasia				Samoa	2011-Present				Epidemiology								Observational study									Outbreak investigation									humans
2948	Western Pacific Region World Health Organization	Pacific Syndromic Surveillance: Week 46, ending 15 Nov, 2015	2015	Epidemiology	English	Grey Lit - Primary Data			Australasia				Samoa	2011-Present	2015/09 - 2015/11/15			Epidemiology								Observational study									Outbreak investigation									humans
[truncated: 274 more columns]
